# Supplementary material
Source: PubMed Central journal article supplement (PMC7847701)
Supplement: mmc1.pdf [file mmc1.pdf]

## TITLE PAGE

**Article type: Research article**

**Full-length title: Introduction into the Marseille geographical area of a mild SARS-CoV-2 variant originating from sub-Saharan Africa**

**Short title: SARS-CoV-2 variant originating from sub-Saharan Africa**

**Author list: Philippe COLSON<sup>1,2</sup>, Anthony LEVASSEUR<sup>1,2</sup>, Philippe GAUTRET<sup>1,2</sup>, Florence FENOLLAR<sup>1,3</sup>, Van Thuan HOANG<sup>1,3,4</sup>, Jeremy DELERCE<sup>1,2</sup>, Idir BITAM<sup>5</sup>, Rachid SAILE<sup>6</sup>, Mossaab MAALOUM<sup>6</sup>, Abdou PADANE<sup>7</sup>, Marielle BEDOTTO<sup>1</sup>, Ludivine BRECHARD<sup>1</sup>, Vincent BOSSI<sup>1</sup>, Mariem BEN KHEDHER<sup>1,2</sup>, Hervé CHAUDET<sup>1,3,8</sup>, Matthieu MILLION<sup>1,2</sup>, Hervé TISSOT-DUPONT<sup>1,2</sup>, Jean-Christophe LAGIER<sup>1,2</sup>, Souleymane MBOUP<sup>7</sup>, Pierre-Edouard FOURNIER<sup>1,3</sup>, Didier RAOULT<sup>1,2</sup>**

**Affiliations:** <sup>1</sup> IHU Méditerranée Infection, Marseille, France; <sup>2</sup> Aix-Marseille Univ, Microbes Evolution Phylogeny and Infections (MEPHI), Marseille, France; <sup>3</sup> Aix-Marseille Univ, Vecteurs - Infections Tropicales et Méditerranéennes (VITROME), Marseille, France; <sup>4</sup> Thai Binh University of Medicine and Pharmacy, Thai Binh, Vietnam, <sup>5</sup> Ecole Nationale Supérieure Vétérinaire d'Alger, Alger, Algeria; <sup>6</sup> Faculty of Sciences Ben M'sik, Hassan II University of Casablanca, Morocco ; <sup>7</sup> Institut de Recherche en Santé, de Surveillance Epidémiologique et de Formation (IRESSEF), Rufisque, Senegal; <sup>8</sup> French Armed Forces Center for Epidemiology and Public Health (CESPA), Marseille, France.

**Corresponding authors:** Didier Raoult, IHU - Méditerranée Infection, 19-21 boulevard Jean Moulin, 13005 Marseille, France. Tel.: +33 413 732 401, Fax: +33 413 732 402; email:

[didier.raoult@gmail.com](mailto:didier.raoult@gmail.com)

Pierre-Edouard Fournier, IHU - Méditerranée Infection, 19-21 boulevard Jean Moulin, 13005

Marseille, France. Tel.: +33 413 732 401, Fax: +33 413 732 402; email: pierre-  
edouard.fournier@univ-amu.fr

## Supplementary Appendix

**Supplementary Figure 1. Weekly numbers of patients with COVID-19 diagnosed in the Méditerranée Infection institute and for whom the SARS-CoV-2 genotype was obtained by genome sequencing or variant-specific RT-PCR, and their geographical origin. M1 indicates Marseille-1 variant; Other designates SARS-CoV-2 genotypes except Marseille-1.**

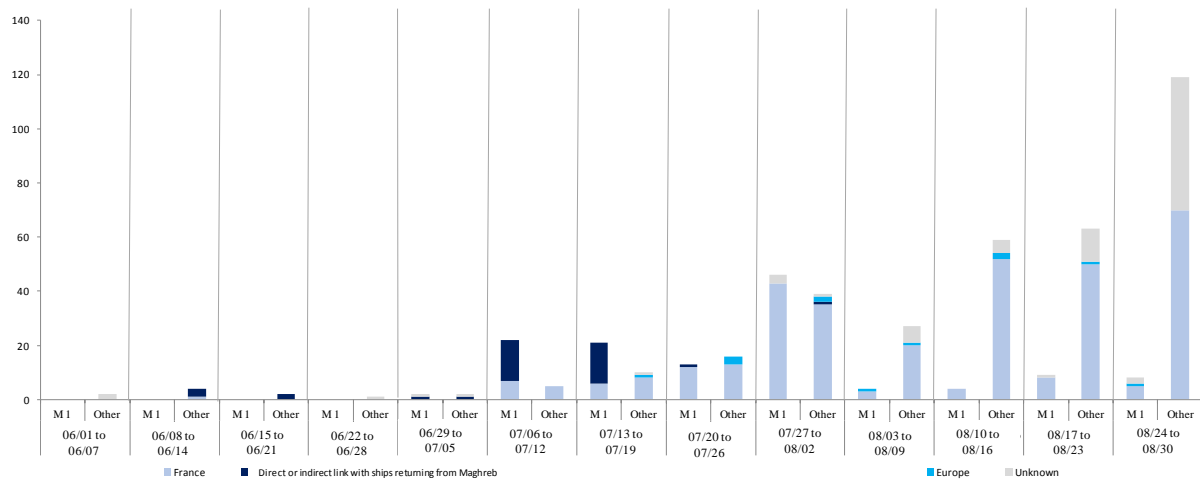

## Supplementary Figure 2. Genome sequence-based phylogenetic tree showing the evolution of Marseille-1 strains

Genome sequences obtained in our institute were compared to those available in the GISAID database (<https://www.gisaid.org/>). Phylogenetic trees were reconstructed and visualized by using the Nextclade and iTOL (<https://itol.embl.de/>) web tools, respectively.

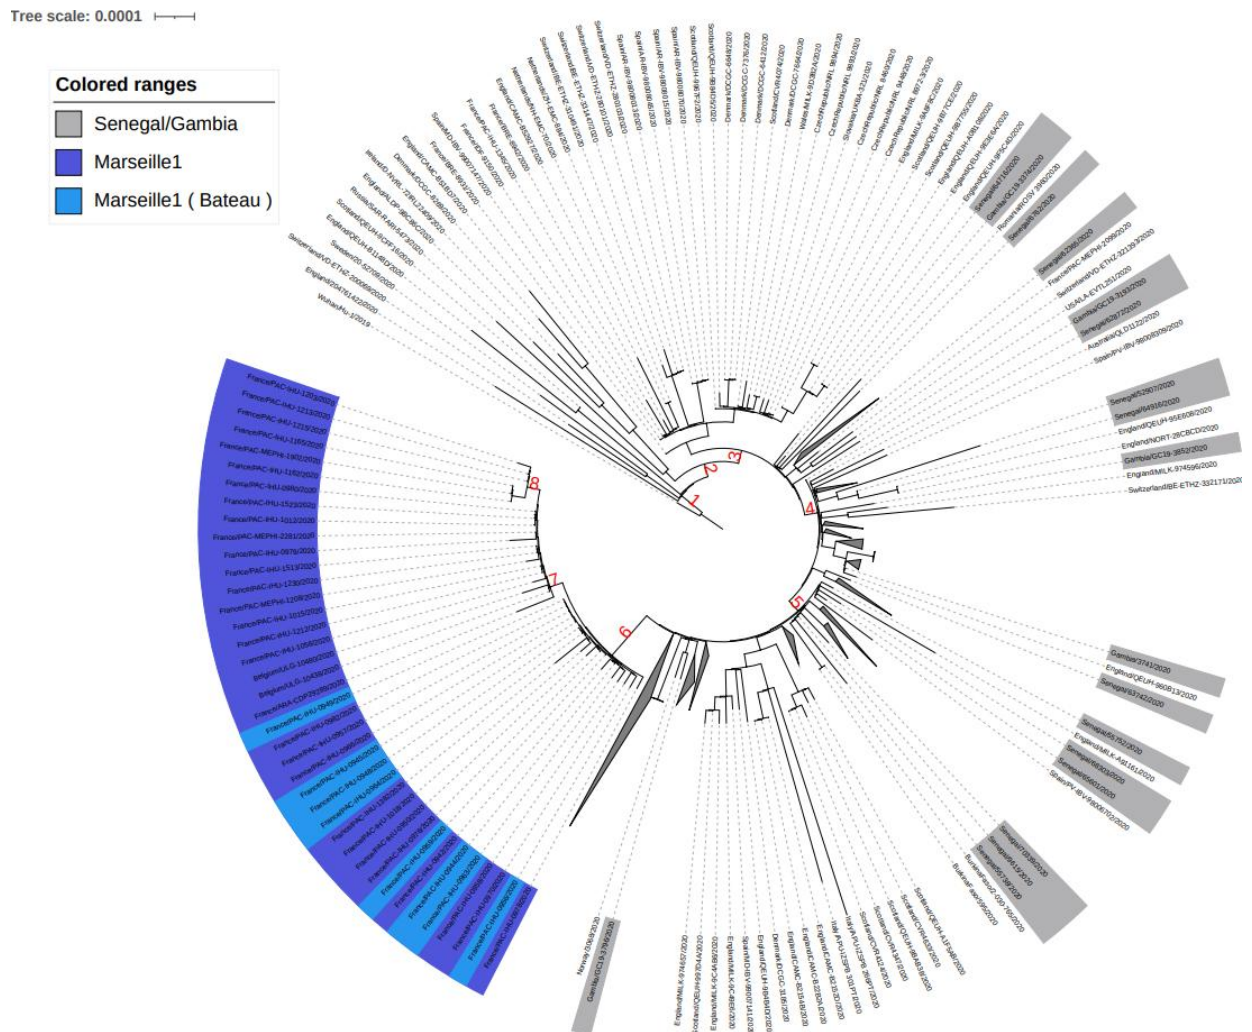

**Supplementary Figure 3. Amino acid alignment and structural prediction obtained using the Phyre2 web portal for protein modeling, prediction and analysis [18] for ORF8 gene product of the Marseille-1 variant.** This figure was obtained using the Phyre2 web portal (<http://www.sbg.bio.ic.ac.uk/~phyre2/html/page.cgi?id=index>).

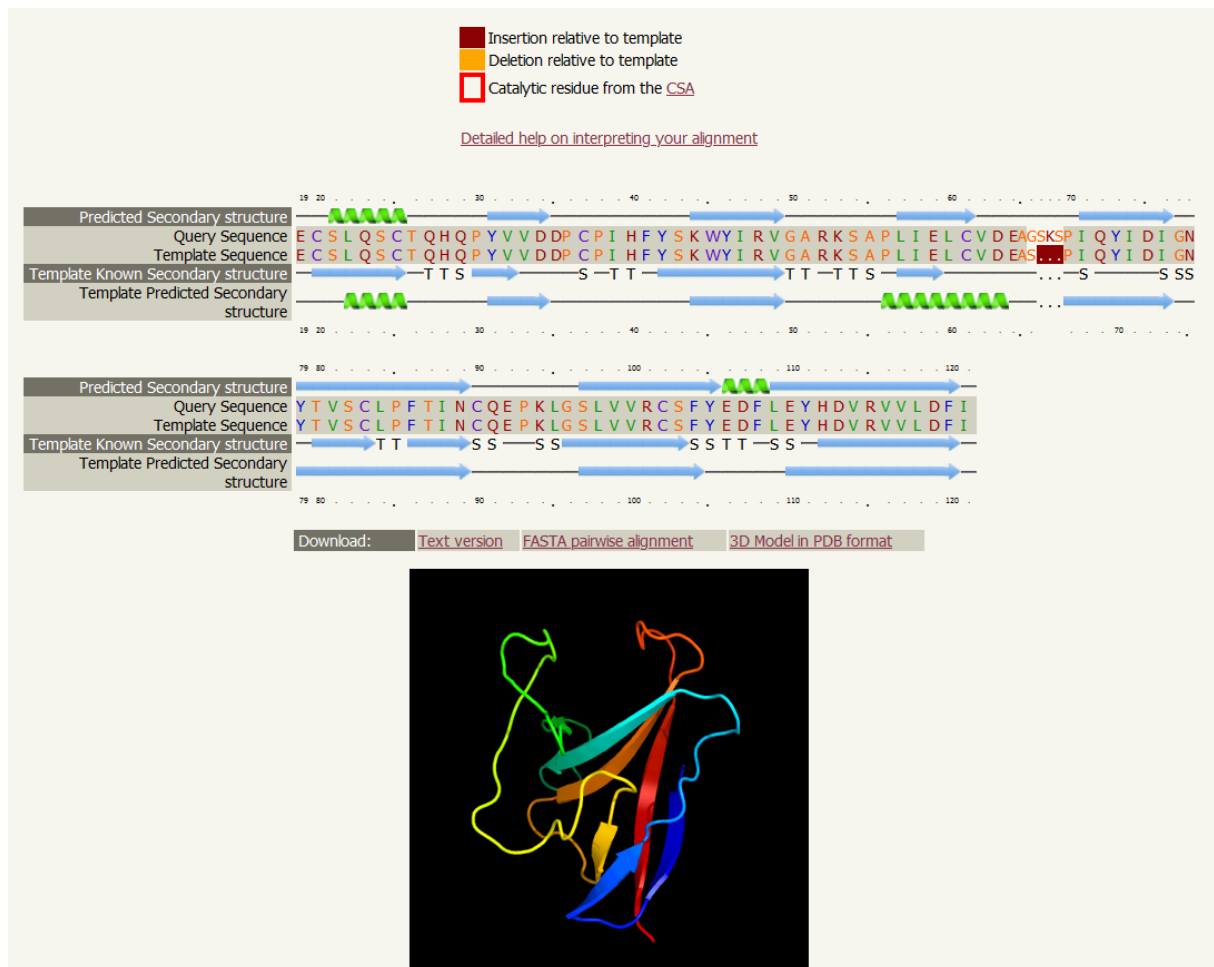

1 **Supplementary Table 1: Detail of commercial travels from Maghreb to France following the re-opening of French borders on June 1<sup>st</sup>,**  
 2 **2020.**

| Country | Date       | Event                                                                                                                                                | Source                                                                                                                                                                                                                                                                                                                                                                                                                                                                                                                                                                                                                                                                                                    |
|---------|------------|------------------------------------------------------------------------------------------------------------------------------------------------------|-----------------------------------------------------------------------------------------------------------------------------------------------------------------------------------------------------------------------------------------------------------------------------------------------------------------------------------------------------------------------------------------------------------------------------------------------------------------------------------------------------------------------------------------------------------------------------------------------------------------------------------------------------------------------------------------------------------|
| Algeria | 25-05-2020 | One daily repatriation flight to Paris                                                                                                               | <a href="https://www.dzairdaily.com/rapatriement-algerie-france-vol-quotidien-alger-paris-tarif-special-consulat-air-france/">https://www.dzairdaily.com/rapatriement-algerie-france-vol-quotidien-alger-paris-tarif-special-consulat-air-france/</a>                                                                                                                                                                                                                                                                                                                                                                                                                                                     |
| Algeria | 26-05-2020 | End of the repatriation of 56,000 French people (15,000 left)                                                                                        | <a href="https://www.leparisien.fr/societe/coronavirus-paris-augmente-les-vols-avec-le-maghreb-pour-rapatrier-15000-francais-26-05-2020-8324328.php">https://www.leparisien.fr/societe/coronavirus-paris-augmente-les-vols-avec-le-maghreb-pour-rapatrier-15000-francais-26-05-2020-8324328.php</a>                                                                                                                                                                                                                                                                                                                                                                                                       |
| Algeria | 01-06-2020 | Reopening of the Lufthansa® and Swiss Air® lines                                                                                                     | <a href="https://www.algerie-eco.com/2020/05/11/alger-francfort-et-alger-geneve-reouvertures-des-reservations-sur-lufthansa-et-swiss/">https://www.algerie-eco.com/2020/05/11/alger-francfort-et-alger-geneve-reouvertures-des-reservations-sur-lufthansa-et-swiss/</a>                                                                                                                                                                                                                                                                                                                                                                                                                                   |
| Algeria | 01-06-2020 | Corsica Linea® maritime link: repatriation of 1000 people                                                                                            | <a href="https://www.diplomatie.gouv.fr/fr/le-ministere-et-son-reseau/actualites-du-ministere/informations-coronavirus-covid-19/coronavirus-declarations-et-communiqués/article/mobilisation-renforcee-pour-faciliter-le-retour-en-france-des-ressortissants">https://www.diplomatie.gouv.fr/fr/le-ministere-et-son-reseau/actualites-du-ministere/informations-coronavirus-covid-19/coronavirus-declarations-et-communiqués/article/mobilisation-renforcee-pour-faciliter-le-retour-en-france-des-ressortissants</a>                                                                                                                                                                                     |
| Algeria | 05-06-2020 | Reopening of Air France flights from Algeria (Algiers, Oran, Annaba, Béjaïa, Constantine) to Paris. 4-5 flights/day for repatriation                 | <a href="https://www.diplomatie.gouv.fr/fr/le-ministere-et-son-reseau/actualites-du-ministere/informations-coronavirus-covid-19/coronavirus-declarations-et-communiqués/article/mobilisation-renforcee-pour-faciliter-le-retour-en-france-des-ressortissants">https://www.diplomatie.gouv.fr/fr/le-ministere-et-son-reseau/actualites-du-ministere/informations-coronavirus-covid-19/coronavirus-declarations-et-communiqués/article/mobilisation-renforcee-pour-faciliter-le-retour-en-france-des-ressortissants</a>                                                                                                                                                                                     |
| Algeria | 07-06-2020 | Corsica Linea® maritime link: repatriation of 1000 people                                                                                            | <a href="https://www.diplomatie.gouv.fr/fr/le-ministere-et-son-reseau/actualites-du-ministere/informations-coronavirus-covid-19/coronavirus-declarations-et-communiqués/article/mobilisation-renforcee-pour-faciliter-le-retour-en-france-des-ressortissants">https://www.diplomatie.gouv.fr/fr/le-ministere-et-son-reseau/actualites-du-ministere/informations-coronavirus-covid-19/coronavirus-declarations-et-communiqués/article/mobilisation-renforcee-pour-faciliter-le-retour-en-france-des-ressortissants</a>                                                                                                                                                                                     |
| Algeria | 09-06-2020 | Corsica Linea® maritime link: repatriation of 1000 people                                                                                            | <a href="https://www.diplomatie.gouv.fr/fr/le-ministere-et-son-reseau/actualites-du-ministere/informations-coronavirus-covid-19/coronavirus-declarations-et-communiqués/article/mobilisation-renforcee-pour-faciliter-le-retour-en-france-des-ressortissants">https://www.diplomatie.gouv.fr/fr/le-ministere-et-son-reseau/actualites-du-ministere/informations-coronavirus-covid-19/coronavirus-declarations-et-communiqués/article/mobilisation-renforcee-pour-faciliter-le-retour-en-france-des-ressortissants</a>                                                                                                                                                                                     |
| Algeria | 27-06-2020 | Closure of air and sea passenger links                                                                                                               | <a href="https://www.garda.com/crisis24/news-alerts/355311/algeria-president-announces-borders-to-remain-closed-until-end-of-covid-19-pandemic-update-20">https://www.garda.com/crisis24/news-alerts/355311/algeria-president-announces-borders-to-remain-closed-until-end-of-covid-19-pandemic-update-20</a>                                                                                                                                                                                                                                                                                                                                                                                             |
| Morocco | 05-06-2020 | Reopening of La Méridionale® links between Nador and Marseille                                                                                       | <a href="https://www.diplomatie.gouv.fr/fr/le-ministere-et-son-reseau/actualites-du-ministere/informations-coronavirus-covid-19/coronavirus-declarations-et-communiqués/article/mobilisation-renforcee-pour-faciliter-le-retour-en-france-des-ressortissants">https://www.diplomatie.gouv.fr/fr/le-ministere-et-son-reseau/actualites-du-ministere/informations-coronavirus-covid-19/coronavirus-declarations-et-communiqués/article/mobilisation-renforcee-pour-faciliter-le-retour-en-france-des-ressortissants</a>                                                                                                                                                                                     |
| Morocco | 05-06-2020 | Opening of 5 crossings until June 9 <sup>th</sup> by company Balearia® for repatriation of 10,000 motorhome operators via Spain                      | <a href="https://www.diplomatie.gouv.fr/fr/le-ministere-et-son-reseau/actualites-du-ministere/informations-coronavirus-covid-19/coronavirus-declarations-et-communiqués/article/mobilisation-renforcee-pour-faciliter-le-retour-en-france-des-ressortissants">https://www.diplomatie.gouv.fr/fr/le-ministere-et-son-reseau/actualites-du-ministere/informations-coronavirus-covid-19/coronavirus-declarations-et-communiqués/article/mobilisation-renforcee-pour-faciliter-le-retour-en-france-des-ressortissants</a>                                                                                                                                                                                     |
| Morocco | 08-06-2020 | Reinforced program of 60 flights between Casablanca or Marrakech and Paris until June 25 <sup>th</sup> for French people repatriation (total 10,000) | <a href="https://www.diplomatie.gouv.fr/fr/le-ministere-et-son-reseau/actualites-du-ministere/informations-coronavirus-covid-19/coronavirus-declarations-et-communiqués/article/mobilisation-renforcee-pour-faciliter-le-retour-en-france-des-ressortissants">https://www.diplomatie.gouv.fr/fr/le-ministere-et-son-reseau/actualites-du-ministere/informations-coronavirus-covid-19/coronavirus-declarations-et-communiqués/article/mobilisation-renforcee-pour-faciliter-le-retour-en-france-des-ressortissants</a>                                                                                                                                                                                     |
| Morocco | 09-06-2020 | Opening of company GNV® passenger link between Tangier and Sète                                                                                      | <a href="https://www.diplomatie.gouv.fr/fr/le-ministere-et-son-reseau/actualites-du-ministere/informations-coronavirus-covid-19/coronavirus-declarations-et-communiqués/article/mobilisation-renforcee-pour-faciliter-le-retour-en-france-des-ressortissants">https://www.diplomatie.gouv.fr/fr/le-ministere-et-son-reseau/actualites-du-ministere/informations-coronavirus-covid-19/coronavirus-declarations-et-communiqués/article/mobilisation-renforcee-pour-faciliter-le-retour-en-france-des-ressortissants</a>                                                                                                                                                                                     |
| Morocco | 06-09-2020 | Opening of the borders                                                                                                                               | <a href="https://www.quotidiendutourisme.com/actualite/destinations/le-maroc-rouvre-ses-frontieres-aux-touristes-francais-605318.php">https://www.quotidiendutourisme.com/actualite/destinations/le-maroc-rouvre-ses-frontieres-aux-touristes-francais-605318.php</a>                                                                                                                                                                                                                                                                                                                                                                                                                                     |
| Tunisia | 04-06-2020 | Corsica Linea® repatriation link 1000 pax                                                                                                            | <a href="https://www.diplomatie.gouv.fr/fr/le-ministere-et-son-reseau/actualites-du-ministere/informations-coronavirus-covid-19/coronavirus-declarations-et-communiqués/article/mobilisation-renforcee-pour-faciliter-le-retour-en-france-des-ressortissants">https://www.diplomatie.gouv.fr/fr/le-ministere-et-son-reseau/actualites-du-ministere/informations-coronavirus-covid-19/coronavirus-declarations-et-communiqués/article/mobilisation-renforcee-pour-faciliter-le-retour-en-france-des-ressortissants</a>                                                                                                                                                                                     |
| Tunisia | 05-06-2020 | 2 weekly repatriation flights                                                                                                                        | <a href="https://www.diplomatie.gouv.fr/fr/le-ministere-et-son-reseau/actualites-du-ministere/informations-coronavirus-covid-19/coronavirus-declarations-et-communiqués/article/mobilisation-renforcee-pour-faciliter-le-retour-en-france-des-ressortissants">https://www.diplomatie.gouv.fr/fr/le-ministere-et-son-reseau/actualites-du-ministere/informations-coronavirus-covid-19/coronavirus-declarations-et-communiqués/article/mobilisation-renforcee-pour-faciliter-le-retour-en-france-des-ressortissants</a>                                                                                                                                                                                     |
| Tunisia | 11-06-2020 | Corsica Linea® repatriation link 1000 pax                                                                                                            | <a href="https://www.diplomatie.gouv.fr/fr/le-ministere-et-son-reseau/actualites-du-ministere/informations-coronavirus-covid-19/coronavirus-declarations-et-communiqués/article/mobilisation-renforcee-pour-faciliter-le-retour-en-france-des-ressortissants">https://www.diplomatie.gouv.fr/fr/le-ministere-et-son-reseau/actualites-du-ministere/informations-coronavirus-covid-19/coronavirus-declarations-et-communiqués/article/mobilisation-renforcee-pour-faciliter-le-retour-en-france-des-ressortissants</a>                                                                                                                                                                                     |
| Tunisia | 27-06-2020 | Reopening of borders                                                                                                                                 | <a href="https://www.facebook.com/santetunisie.rns.tn/posts/3144668892238860?__cft__[0]=AZVaQeBvNr1QpIz5hPt91WzVLWjjz5Vlebruy7gCYLT AHQB16zSdm4jKkg1iZ743TBO7fgU8mFkeh0OULz1cMAfYR49neCNeiyJ77GCT_pCABhK2OkKT0s8onjdVcZPkSW8VJ7pS-xj0pF2ZdGUcuZp3-dcm_eGlmADU69qSBWU4vK5C4HIXJoGeoTPFvpe1k1CeflGT hadtllqMfzzKedG2KiasadUzGTzg0AzkA&amp;__tn__=%2C P-R">https://www.facebook.com/santetunisie.rns.tn/posts/3144668892238860?__cft__[0]=AZVaQeBvNr1QpIz5hPt91WzVLWjjz5Vlebruy7gCYLT AHQB16zSdm4jKkg1iZ743TBO7fgU8mFkeh0OULz1cMAfYR49neCNeiyJ77GCT_pCABhK2OkKT0s8onjdVcZPkSW8VJ7pS-xj0pF2ZdGUcuZp3-dcm_eGlmADU69qSBWU4vK5C4HIXJoGeoTPFvpe1k1CeflGT hadtllqMfzzKedG2KiasadUzGTzg0AzkA&amp;__tn__=%2C P-R</a> |
| Tunisia | 29-06-2020 | Resumption of ferry links (around 700 passengers per rotation)                                                                                       | <a href="https://www.webmanagercenter.com/2020/06/29/452895/transport-maritime-reprise-du-traffic-maritime-au-port-de-zarzis/">https://www.webmanagercenter.com/2020/06/29/452895/transport-maritime-reprise-du-traffic-maritime-au-port-de-zarzis/</a>                                                                                                                                                                                                                                                                                                                                                                                                                                                   |

3
